# Supplementary material for: Harnessing the Genetic Plasticity of Porcine Circovirus Type 2 to Target Suicidal Replication
Source: MDPI journal article supplement (doi:10.3390/v13091676), 2021-08-24
Supplement: s1 [file s1]

## Sequences - Supplementary Data S1

### Wildtype PCV2b 41513 ORF2 DNA

ATGACGTATCCAAGGAGGCGTTACCGGAGAAGAAGACACCGCCCCCGCAGCCATCTTGGCCAGATCC  
TCCGCCGCCGCCCTGGCTCGTCCACCCCGCCACCGTTACCGCTGGAGAAGGAAAAATGGCATCTTC  
AACACCCGCCTATCCCGCACCTTCGGATATACTATCAAGCGAACCACAGTCAGAACGCCCTCCTGGGC  
GGTGGACATGATGAGATTCAATATTAATGCCTTTCTTCCCCCAGGAGGGGGCTCAAACCCCGCTCTG  
TGCCCTTTGAATACTACAGAATAAGAAAGGTTAAGGTTGAATTCTGGCCCTGCTCCCCGATCACCCAG  
GGTGACAGGGGAGTGGGCTCCAGTGCTGTTATTCTAGATGATAACTTTGTAACAAAGGCCACAGCCCT  
CACCTATGACCCCTATGTAACTACTCCTCCCGCCATACCATAACCCAGCCCTTCTCCTACCACTCCCG  
CTACTTTACCCCCAAACCTGTACTAGATTCCACTATTGATTACTTCCAACCAACAACAAAAGAAACC  
AGCTGTGGCTGAGACTACAACTGCTGGAAATGTAGACCACGTAGGCCTCGGCACTGCGTTCGAAAA  
CAGTATATACGACCAGGGATACAATATCCGTGTAACCATGTATGTACAATTAGAGAATTTAATCTTA  
AAGACCCCCCACTTAACCCTTAA

### sPCV2-Vac ORF2 DNA with mutated serine and leucine codons in small letters

ATGACGTATCCAAGGAGGCGTTACCGGAGAAGAAGACACCGCCCCCGCAGCCATCTTGGCCAGATCtt  
aCGCCGCCGCCCTGGttGTCCACCCCGCCACCGTTACCGCTGGAGAAGGAAAAATGGCATCTTCAA  
CACCCGcttatcaCGCACCTTCGGATATACTATCAAGCGAACCACAGTCAGAACGCCctgTGGGCGGTGG  
ACATGATGAGATTCAATATTAATGCCTTTtgCCCCCAGGAGGGGGCTCAAACCCCGCtcaGTGCCCTTT  
GAATACTACAGAATAAGAAAGGTTAAGGTTGAATTCTGGCCCTGctcaCCGATCACCCAGGGTGACAG  
GGGAGTGGGctgctcaGCTGTTATTtgGATGATAACTTTGTAACAAAGGCCACAGCCttaACCTATGACCCC  
TATGTAACTACTcatcgCGCCATACCATAACCCAGCCCTTctgTACCActcaCGTACTTTACCCCCAAAC  
CTGTAttaGATtcaACTATTGATTACTTCCAACCAACAACAAAAGAAACCAGttgTGgtgAGAttaCAAAC  
GCTGGAAATGTAGACCACGTAGGcttgGGCACTGCGTTCGAAAACAGTATATACGACCAGGGATACAA  
TATCCGTGTAACCATGTATGTACAATTAGAGAATTTAATCTTAAAGACCCCCCACTTAACCCTTAA

### PCV2b 41513 ORF2 protein – wildtype and mutated sequence

MTYPRRRYRRRRHRPRSHLGQILRRRPWLHPRHRYRWRRKNGIFNTRLSRTFGYTIKRTTVRTPSWAVDM  
MRFNINAFLLPPGGGSNPRSVPFYYRIRKVKVEFWPCSPITQGDGRGVGSSAVILDDNFVTKATALTYDPYVNY  
SSRHTITQPFYSYHSRYFTPKPVLSTIDYFQPNNKRNLWLRLQTAGNVDPVGLGTAFENSIYDQGYNIRVT  
MYVQFREFNLKDPPLNP

### Sequencing of samples passaged under selection pressure

#### S PCV2-Vac DNA sequence

ATGACGTATCCAAGGAGGCGTTACCGGAGAAGAAGACACCGCCCCCGCAGCCATCTTGGCCAGATCt  
GagGCCGCCGCC  
CTGGtggGTCCACCCCGCCACCGTgACCGCaGGAGAAGGAAAAATGGCATCTTCAACACCCGctGatGa  
CGCACCTTCG  
GATATACTAcCAAGCcgACCACAGTCAGAACGCCctGgTGGGCGGTGGACATGATGAGATTCAATATTA  
cTGctTTTtAg  
gCCCCAcGAGGGGGCTcGAACCCCGctAaGTGCCCTTTGAATACTACAGAATAAGAAAGGTTAAGGTT  
GAATTCTGGCC  
CTGctcaCCGATCACCCAGGGTGACAGGGGAGTGGGctgctcaGCTGTTATTtgGATGATAACTTTGTAACA  
AAGGCCA

CAGCCttaACCTATGACCCCTATGTAAACTACtcatcgCGCCATACCATAACCCAGCCCTTCtgTACCACtca  
CGCTAC  
TTTACCCCCAAACCTGTAttaGATtcaACTATTGATTACTTCCAACCAAACAACAAAAGAAACCAGttgTGG  
ttgAGAtt  
aCAAACCTGCTGGAAATGTAGACCACGTAGGCttgGGCACTGCGTTCGAAAACAGTATATACGACCAGG  
GATACAATATCC  
GTGTAACCATGTATGTACAATTCAGAGAATTTAATCTTAAAGACCCCCCACTTAACCCTTAA\_

#### **S PCV2-Vac Protein sequence**

MTYPRRRYRRRRHRPRSHLGQI.GRRPWWVHPRHRDRRRRKNIGFNR..RTFGYTTKPTTVRTPWWAVDM  
MRFNITAF.  
APRGGSNPR.VPFEYYRIRKVKVEFWPCSPITQGDRGVGSSAVILDDNFVTKATALTYDPYVNYSSRHITITQPF  
YHSRY  
FTPKPVLSTIDYFQPNKRNQLWLRLQTAGNVHDVGLGTAFENSIYDQGYNIRVTMYVQFREFNLKDPPL  
NP\_

-

#### **Wildtype NGS sequencing**

**Wildtype**: Only 3 mutations, two silent, and 1 Leu to Val were detected.

#### **Wildtype PCV2b 41513 ORF2 DNA sequence**

ATGACGTATCCAAGGAGGCGTTACCGGAGAAGAAGACACCGCCCCCGCAGCCATCTTGCCAGATCC  
TCCGCCGCCGCC  
CTGGCTCGTCCACCCCGCCACCGTTACCGCTGGAGAAGGAAAAATGGCATCTTCAACACCCGCCTAT  
CCCGCACCTTCG  
GATATACTATCAAGCGAACCACAGTCAGAACGCCCTCCTGGGCGGTGGACATGATGAGATTCAATATT  
AATGCTTTTCTT  
CCCCCAGGAGGGGGCTCAAACCCCGCTCTGTGCCCTTTGAATACTACAGAATAAGAAAGGTTAAGG  
TTGAATTCTGGCC  
CTGCTCCCCGATCACCCAGGGTGACAGGGGAGTGGGCTCCAGTGCTGTTATTCTAGATGATAACTTTGT  
AACAAAGGCCA  
CAGCCCTCACCTATGACCCCTATGTAAACTACTCCTCCCGCCATACCATAACCCAGCCCTTCTCCTACC  
ACTCCCGCTAC  
TTTACCCCCAAACCTGTAGTAGATTCCACTATTGATTACTTCCAACCAAACAACAAAAGAAACCAGCT  
GTGGCTGAGACT  
ACAAACTGCTGGAAATGTAGACCACGTAGGCCTCGGCACTGCGTTCGAAAACAGTATATACGACCAG  
GGTTACAATATCC  
GTGTAACCATGTATGTACAATTCAGAGAATTTAATCTTAAAGACCCCCCACTTAACCCTTAA\_

#### **Wildtype PCV2b 41513 ORF2 protein sequence**

MTYPRRRYRRRRHRPRSHLGQILRRRPWLHPRHRYRWRRKNIGFNRSLRTFGYTIKRTTVRTPSWAVDM  
MRFNINAF.  
PPGGGSNPRSPFEYYRIRKVKVEFWPCSPITQGDRGVGSSAVILDDNFVTKATALTYDPYVNYSSRHITITQPF  
SYHSRY

FTPKPVVDSTIDYFQPNNKRNQLWLRLQTAGNVDPVGLGTAFENSIYDQGYNIRVTMYVQFREFNLKDPPL  
NP\_
